# Supplementary material for: Myc inhibition is effective against glioma and reveals a role for Myc in proficient mitosis
Source: PubMed Central journal article supplement — Nat Commun. 2014 Aug 18;5:4632. doi: 10.1038/ncomms5632 (PMC4143920; doi:10.1038/ncomms5632), 2014-08-18
Supplement: ncomms5632-s1.pdf [file ncomms5632-s1.pdf]

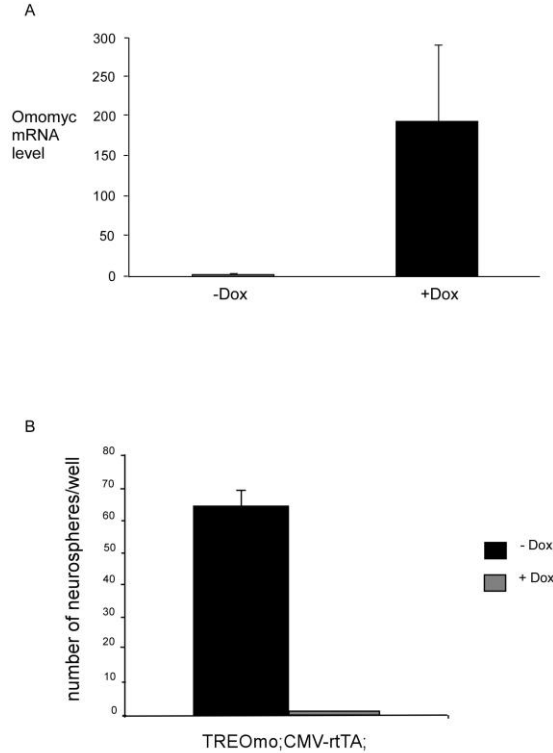

*Supplementary Fig. 1. Omomyc expression is tightly regulated in mouse-derived neuroprogenitor cells.*

A. Analysis of Omomyc mRNA expression in samples of mouse NPGs in the presence or absence of doxycycline.

B. Omomyc expression impairs the self-renewal ability of non-transformed NPGs. Single neuroprogenitors were plated at a clonal density (500/well) in a 12 well plate and treated or not with doxycycline. After 21 days, the number of spheres was evaluated. Data are shown as means  $\pm$  SE of triplicates (n=2). p-values were calculated by paired t-test.

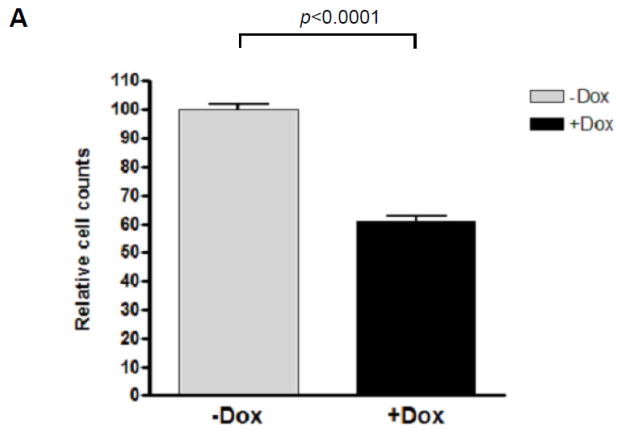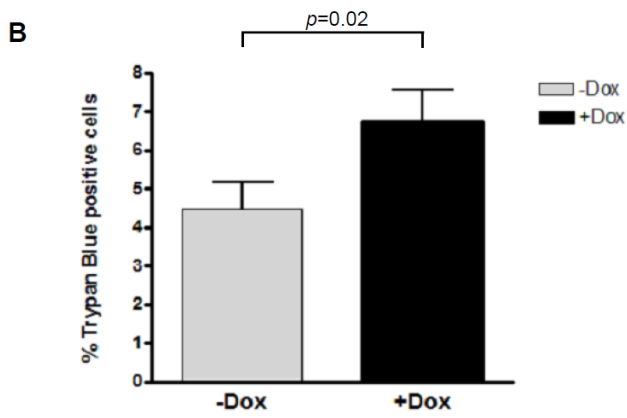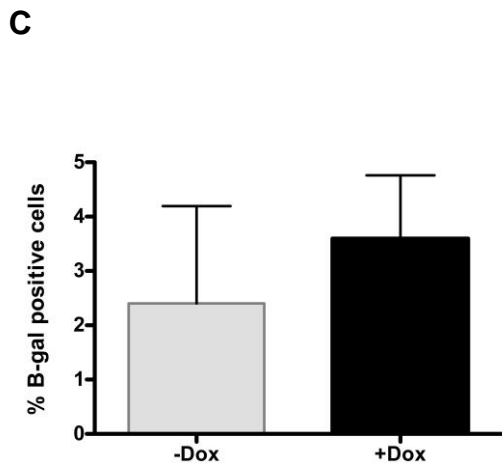

Supplementary Fig. 2. Omomyc inhibits the growth of U373MG cells.

A. U373MG cells were infected with a lentivirus containing a doxycycline-regulatable Omomyc expression cassette. Induction of Omomyc by doxycycline treatment for 8 days reduced the number of cells (n=4). Means + SEM are shown.

B. Cell death is triggered by Myc inhibition in U373MG cells (n=4). Means + SEM are shown.

C. U373MG cells were infected with a doxycycline-switchable lentiviral vector expressing Omomyc. Doxycycline treatment does not affect the number of  $\beta$ -galactosidase positive, senescent-like cells. The average of 3 experiments + SE is shown. *p*-values were calculated by a Student's *t*-test.

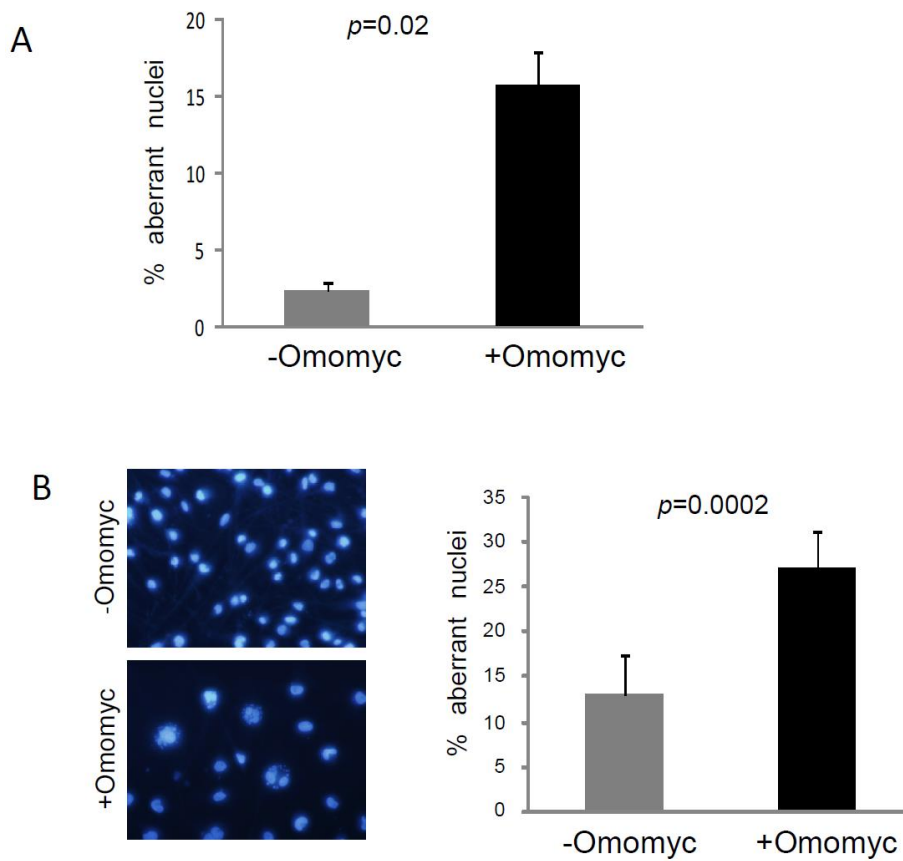

*Supplementary Fig. 3. Omomyc expression increases the appearance of aberrant nuclei in human GBM cells.*

A. Omomyc expression for 8 days increases the number of cells with aberrant nuclei in U87MG cells. Nuclei visualized by Hoechst staining. The mean +SEM of 3 experiments is shown.

B. Omomyc expression for 8 days increases the number of cells with aberrant nuclei in U373MG cells as visualized by Hoechst labeling (left panels: representative images, right panels: quantitation; n=4.). The mean +SEM of 4 experiments is shown.

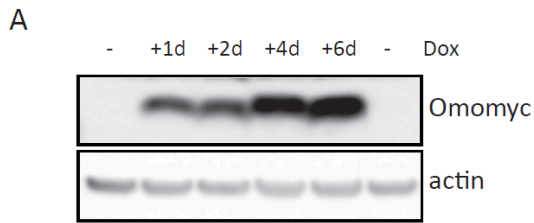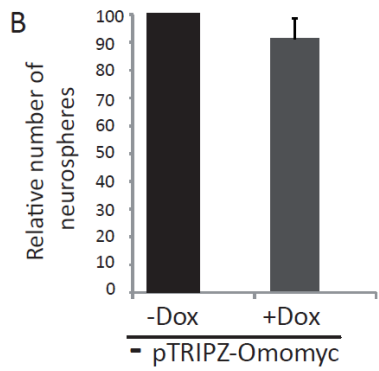

*Supplementary Fig. 4. Expression of Omomyc in human patient-derived neurospheres.*

A. Western blot analysis showing that Omomyc expression is tightly regulated by Dox in neurospheres infected with a lentiviral pTRIPZ-Omomyc expression vector.

B. Dox treatment of patient-derived neurospheres lacking Omomyc expression does not affect neurosphere growth. The mean +SEM of 4 experiments is shown.

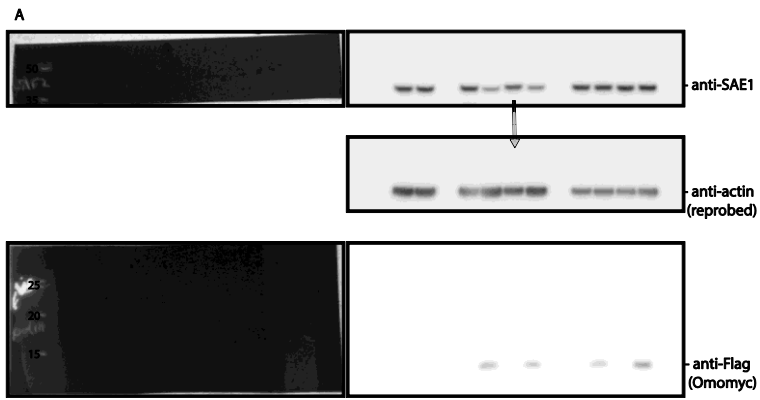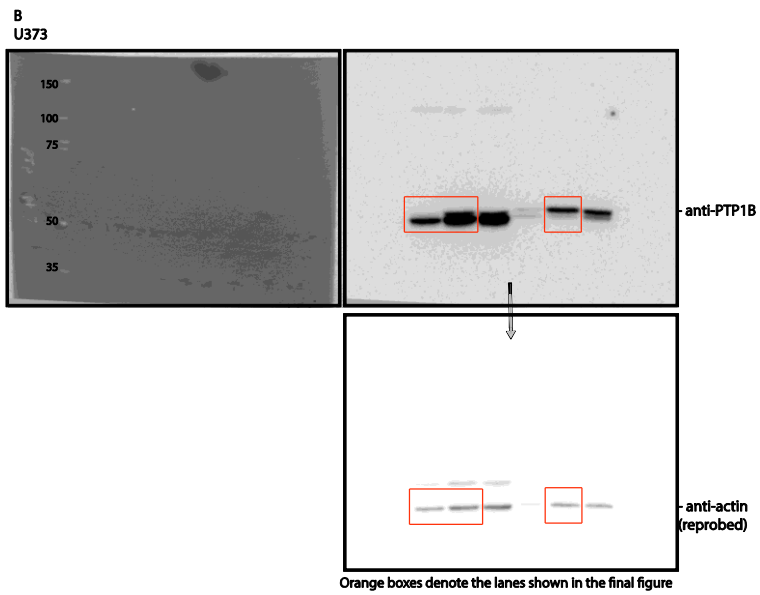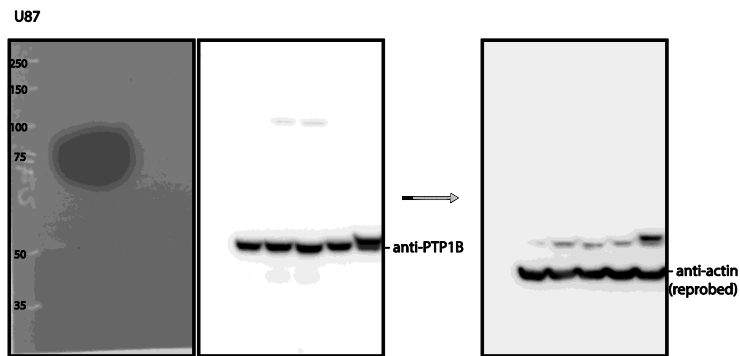

*Supplementary Fig. 5. Original blots for Figure 7.*

A. Full blot images for Figure 7A.

B. Full blot images for Figure 7B.
